# Supplementary material
Source: Royal Society of Chemistry journal article supplement (doi:10.1039/d6ma00193a)
Supplement: d6ma00193a1.pdf [file d6ma00193a1.pdf]

## Supporting Information

### Ex-situ modification of activated carbon through hydrothermal oxidation and sulphur@amine doping for highly efficient Pb<sup>2+</sup> sorption: Experimental and modelling approaches

Idris-Hermann TIOTSOP KUETE<sup>1\*</sup>, Cyrille Ghislain FOTSOP<sup>2</sup>, Alexandra LIEB<sup>2</sup>, Franziska SCHEFFLER<sup>2\*</sup>

<sup>1</sup>Materials and Process Engineering Team, Research Unit of Noxious Chemistry and Environmental Engineering (RUNOCHEE), Department of Chemistry, Faculty of Science, University of Dschang, P.O. Box 67, Dschang, Cameroon

<sup>2</sup>Otto-von-Guericke-University Magdeburg, Chemical Institute, Chair for Industrial Chemistry, Universitätsplatz 2, 39106 Magdeburg, Germany

\* Corresponding author

E-mail address: hermann.kuete90@gmail.com; franziska.scheffler@ovgu.de

**Table S1:** Central composite design for the adsorption of Pb<sup>2+</sup> using ACH-L-Cyst and AC-KMnO<sub>4</sub>

| N°  | pH | Time (min) | Concentration (mg/L) | Mass (mg) |
|-----|----|------------|----------------------|-----------|
| 1.  | 8  | 5          | 20                   | 100       |
| 2.  | 5  | 122.5      | 210                  | 60        |
| 3.  | 5  | 122.5      | 210                  | 60        |
| 4.  | 2  | 240        | 400                  | 100       |
| 5.  | 5  | 240        | 210                  | 60        |
| 6.  | 5  | 5          | 210                  | 60        |
| 7.  | 8  | 240        | 400                  | 100       |
| 8.  | 2  | 240        | 20                   | 20        |
| 9.  | 5  | 122.5      | 210                  | 20        |
| 10. | 5  | 122.5      | 20                   | 60        |
| 11. | 2  | 122.5      | 210                  | 60        |
| 12. | 5  | 122.5      | 210                  | 60        |
| 13. | 2  | 5          | 20                   | 100       |
| 14. | 2  | 240        | 20                   | 100       |
| 15. | 8  | 240        | 400                  | 20        |
| 16. | 8  | 5          | 400                  | 100       |
| 17. | 2  | 240        | 400                  | 20        |
| 18. | 5  | 122.5      | 210                  | 100       |
| 19. | 5  | 122.5      | 210                  | 60        |
| 20. | 8  | 5          | 400                  | 20        |
| 21. | 8  | 122.5      | 210                  | 60        |
| 22. | 8  | 240        | 20                   | 20        |
| 23. | 2  | 5          | 400                  | 20        |
| 24. | 8  | 5          | 20                   | 20        |
| 25. | 2  | 5          | 400                  | 100       |
| 26. | 8  | 240        | 20                   | 100       |
| 27. | 5  | 122.5      | 400                  | 60        |
| 28. | 2  | 5          | 20                   | 20        |

**Table S2:** Mathematical kinetics models

| Kinetic models          | Non-linear forms                                                | References |
|-------------------------|-----------------------------------------------------------------|------------|
| Pseudo-first order      | $Q_t = Q_e (1 - e^{-K_1 t})$                                    | [1]        |
| Pseudo-second order     | $Q_t = \frac{K_2 Q_e^2 t}{(1 + K_2 Q_e t)}$ and $h = K_2 Q_e^2$ | [1]        |
| Intraparticle diffusion | $Q_t = K_{int} t^{\frac{1}{2}} + C$                             | [2], [3]   |
| Elovich                 | $Q_t = \frac{1}{\beta} \ln(1 + \alpha \beta t)$                 | [4]        |

**Table S3:** Mathematical isotherm models

| Parameters | Isotherms            | Non-linear forms                                                        | References |
|------------|----------------------|-------------------------------------------------------------------------|------------|
| Two        | Langmuir             | $Q_e = \frac{Q_m K_L C_e}{1 + K_L C_e}$                                 | [1], [5]   |
|            | Freundlich           | $Q_e = K_f C_e^{1/n}$                                                   | [1], [5]   |
|            | Jovanovic            | $Q_e = Q_m (1 - e^{-K_j C_e})$                                          | [4]        |
|            | Temkin               | $Q_e = \frac{RT}{\Delta Q} \ln(ACe)$                                    | [4]        |
|            | Dubinin-Radushkevich | $Q_e = Q_m \exp(-\beta \varepsilon^2)$                                  | [5]        |
| Three      | Langmuir-Freundlich  | $Q_e = \frac{Q_{mLF} (K_{LF} C_e)^{M_{LF}}}{1 + (K_{LF} C_e)^{M_{LF}}}$ | [4]        |
|            | Redlich-peterson     | $Q_e = \frac{K_{RP} C_e}{1 + A_{RP} C_e^g}$                             | [6]        |

Langmuir separation factor:  $R_L = \frac{1}{1 + K_L C_0}$

**Table S4:** Error functions and their equations

| Error function                  | Abbreviation   | formula                                                                                                             | References |
|---------------------------------|----------------|---------------------------------------------------------------------------------------------------------------------|------------|
| Residual Root Mean Square Error | RMSE           | $\sqrt{\frac{1}{n-2} \sum_{i=1}^N (Q_{e,exp} - Q_{e,cal})^2}$                                                       | [7]        |
| Chi-square test                 | $\chi^2$       | $\sum_{i=1}^N \frac{(Q_{e,exp} - Q_{e,cal})^2}{Q_{e,cal}}$                                                          | [7]        |
| Sum Square of Errors            | SCE            | $\sum_{i=1}^N (Q_{e,exp} - Q_{e,cal})_i^2$                                                                          | [7]        |
| Average Relative Error          | ARE            | $\frac{100}{N} \sum_{i=1}^N \left  \frac{Q_{e,i,cal} - Q_{e,i,exp}}{Q_{e,i,exp}} \right $                           | [7]        |
| coefficient of determination    | R <sup>2</sup> | $\frac{\sum_{i=1}^N (Q_{e,cal} - Q_{m,exp})^2}{\sum_{i=1}^N (Q_{e,cal} - Q_{m,exp})^2 + (Q_{e,cal} - Q_{m,exp})^2}$ | [7]        |

**Table S5:** Model fit and summary statistics for ACH-L-Cyst

| Source           | Std. Dev.   | R <sup>2</sup> | Adjusted R <sup>2</sup> | Predicted R <sup>2</sup> | PRESS          |                  |
|------------------|-------------|----------------|-------------------------|--------------------------|----------------|------------------|
| Linear           | 17.26       | 0.2111         | 0.0739                  | -0.1301                  | 9810.94        |                  |
| 2FI              | 16.45       | 0.4702         | 0.1585                  | 0.1614                   | 7280.48        |                  |
| <b>Quadratic</b> | <b>4.36</b> | <b>0.9716</b>  | <b>0.9410</b>           | <b>0.7718</b>            | <b>1981.21</b> | <b>Suggested</b> |
| Cubic            | 2.09        | 0.9975         | 0.9864                  | 0.6917                   | 2676.86        | Aliased          |

**Table S6:** Model fit and summary statistics for AC-KMnO<sub>4</sub>

| Source           | Std. Dev.   | R <sup>2</sup> | Adjusted R <sup>2</sup> | Predicted R <sup>2</sup> | PRESS         |                  |
|------------------|-------------|----------------|-------------------------|--------------------------|---------------|------------------|
| Linear           | 9.17        | 0.3319         | 0.2157                  | -0.1129                  | 3221.83       |                  |
| 2FI              | 5.70        | 0.8090         | 0.6966                  | 0.6032                   | 1148.71       |                  |
| <b>Quadratic</b> | <b>1.85</b> | <b>0.9847</b>  | <b>0.9682</b>           | <b>0.8905</b>            | <b>316.86</b> | <b>Suggested</b> |
| Cubic            | 1.54        | 0.9959         | 0.9779                  | 0.1469                   | 2469.59       | Aliased          |

**Table S7:** Residual from adsorption of Pb<sup>2+</sup> ions using the central composite design

| Run Order | pH | Time (min) | Concentration (mg/L) | Mass (mg) | Residual ACH-L-Cyst | Residual AC-KMnO <sub>4</sub> |
|-----------|----|------------|----------------------|-----------|---------------------|-------------------------------|
| 1         | +1 | -1         | -1                   | +1        | 3.60                | 1.88                          |
| 2         | 0  | 0          | 0                    | 0         | -3.18               | -0.72                         |
| 3         | 0  | 0          | 0                    | 0         | 0.38                | -0.68                         |
| 4         | -1 | +1         | +1                   | +1        | -0.57               | -0.23                         |
| 5         | 0  | +1         | 0                    | 0         | 1.64                | 0.21                          |
| 6         | 0  | -1         | 0                    | 0         | -0.57               | 0.78                          |
| 7         | +1 | +1         | +1                   | +1        | 5.70                | -0.68                         |
| 8         | -1 | +1         | -1                   | -1        | 1.44                | -0.42                         |
| 9         | 0  | 0          | 0                    | -1        | 0.30                | -0.97                         |
| 10        | 0  | 0          | -1                   | 0         | -1.28               | 0.84                          |
| 11        | -1 | 0          | 0                    | 0         | 0.23                | -0.83                         |
| 12        | 0  | 0          | 0                    | 0         | 0.56                | -0.99                         |
| 13        | -1 | -1         | -1                   | +1        | 3.00                | -3.11                         |
| 14        | -1 | +1         | -1                   | +1        | 0.80                | 1.86                          |
| 15        | +1 | +1         | +1                   | -1        | -4.53               | 1.62                          |
| 16        | +1 | -1         | +1                   | +1        | -2.97               | -1.07                         |
| 17        | -1 | +1         | +1                   | -1        | -2.33               | -0.63                         |
| 18        | 0  | 0          | 0                    | +1        | 0.78                | 1.96                          |
| 19        | 0  | 0          | 0                    | 0         | -0.99               | -0.6                          |
| 20        | +1 | -1         | +1                   | -1        | 0.47                | -0.61                         |
| 21        | +1 | 0          | 0                    | 0         | 0.85                | 1.82                          |
| 22        | +1 | +1         | -1                   | -1        | 4.73                | 0.07                          |
| 23        | -1 | -1         | +1                   | -1        | 5.34                | 0.28                          |
| 24        | +1 | -1         | -1                   | -1        | -0.97               | -1.26                         |
| 25        | -1 | -1         | +1                   | +1        | -3.46               | 1.17                          |
| 26        | +1 | +1         | -1                   | +1        | -6.88               | -1.78                         |
| 27        | 0  | 0          | +1                   | 0         | 2.35                | 0.15                          |
| 28        | -1 | -1         | -1                   | -1        | -4.44               | 1.93                          |

**Table S8:** Optimal conditions for adsorption, as well as the predicted and experimental values

| Response             | Conditions |            |                      |           | % Pb <sup>2+</sup> removal |                    | Error percentage |
|----------------------|------------|------------|----------------------|-----------|----------------------------|--------------------|------------------|
|                      | pH         | Time (min) | Concentration (mg/L) | Mass (mg) | Predicted value            | Experimental value |                  |
| ACH-L-Cyst           | 5          | 122.5      | 210                  | 60        | 78.82                      | 77.20              | 1.62             |
| AC-KMnO <sub>4</sub> | 5          | 122.5      | 210                  | 60        | 98.10                      | 97.22              | 0.88             |

**Table S9:** Percentages of  $Pb^{2+}$  ion removal by the two adsorbents

|                     | ACH-L-Cyst          | AC-KMnO <sub>4</sub> |
|---------------------|---------------------|----------------------|
| <b>Nbr of Cycle</b> | Adsorption rate / % |                      |
| <b>1</b>            | 77.00206            | 97.47369             |
| <b>2</b>            | 74.26487            | 95.9656              |
| <b>3</b>            | 71.84361            | 83.78402             |
| <b>4</b>            | 67.22775            | 77.69731             |
| <b>5</b>            | 67.07417            | 67.78589             |
| <b>6</b>            | 59.39954            | 66.97124             |

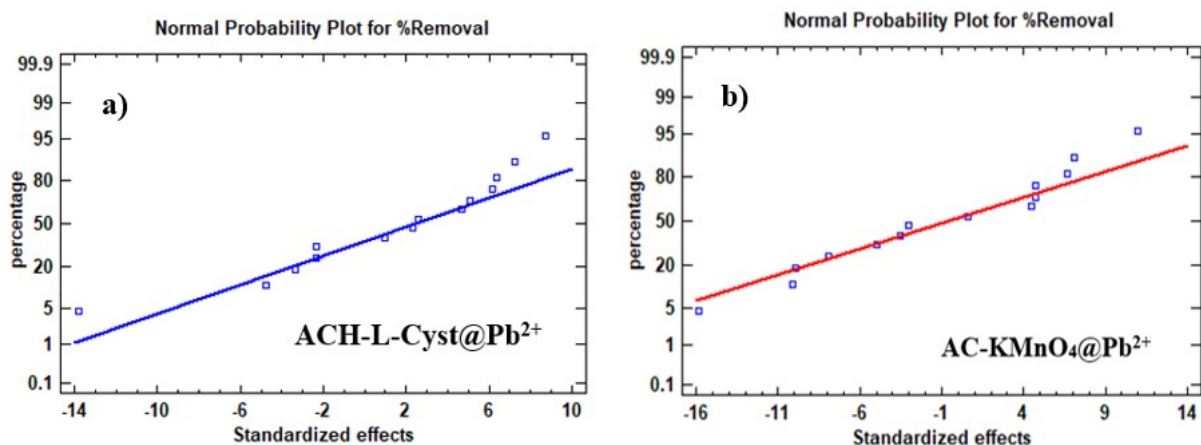

**Figure S1 :** Normal probability plot for the % Removal of  $Pb^{2+}$  adsorbed

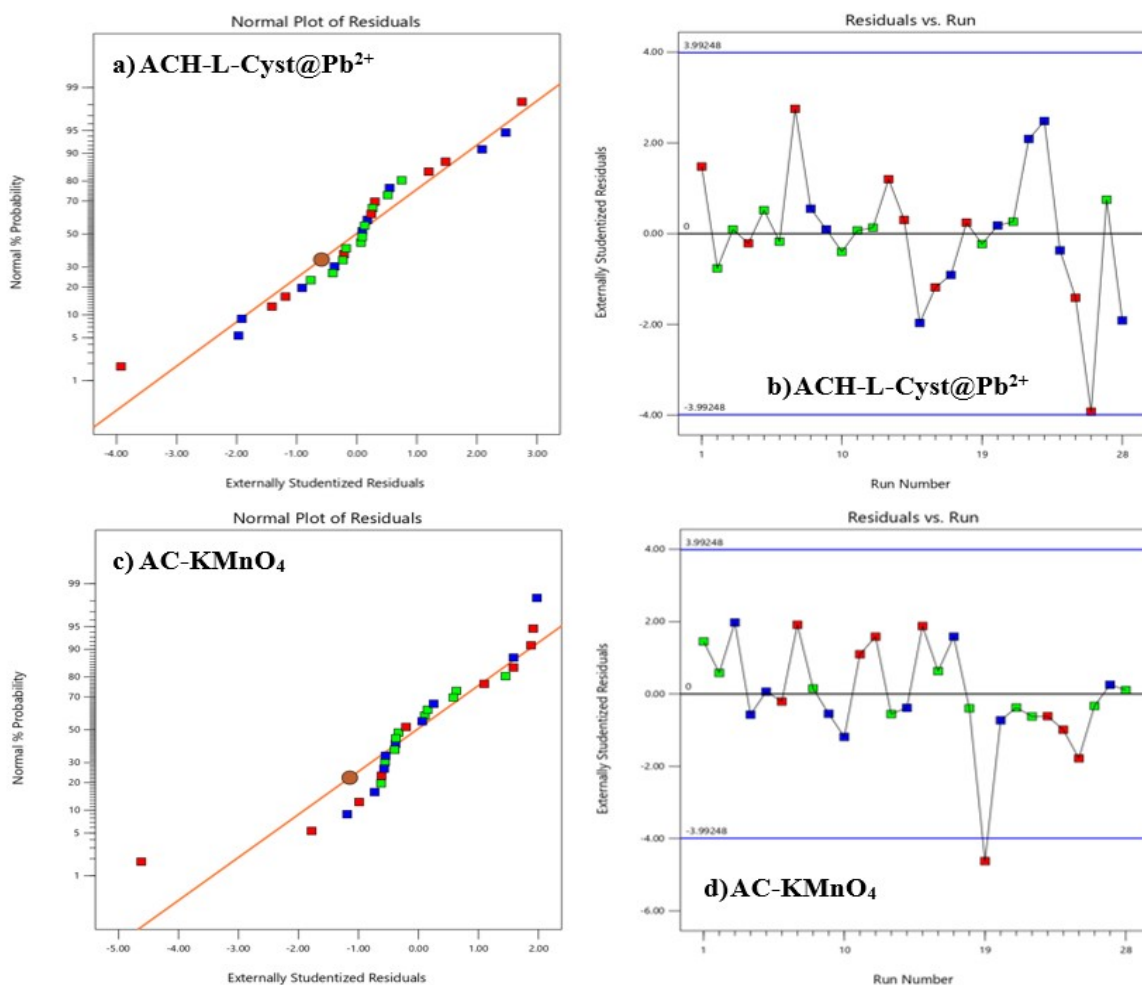

**Figure S2 :** Normal % probability of residuals (a & c) and externally studentized residuals vs run number for Pb<sup>2+</sup> ions removal (b & d).

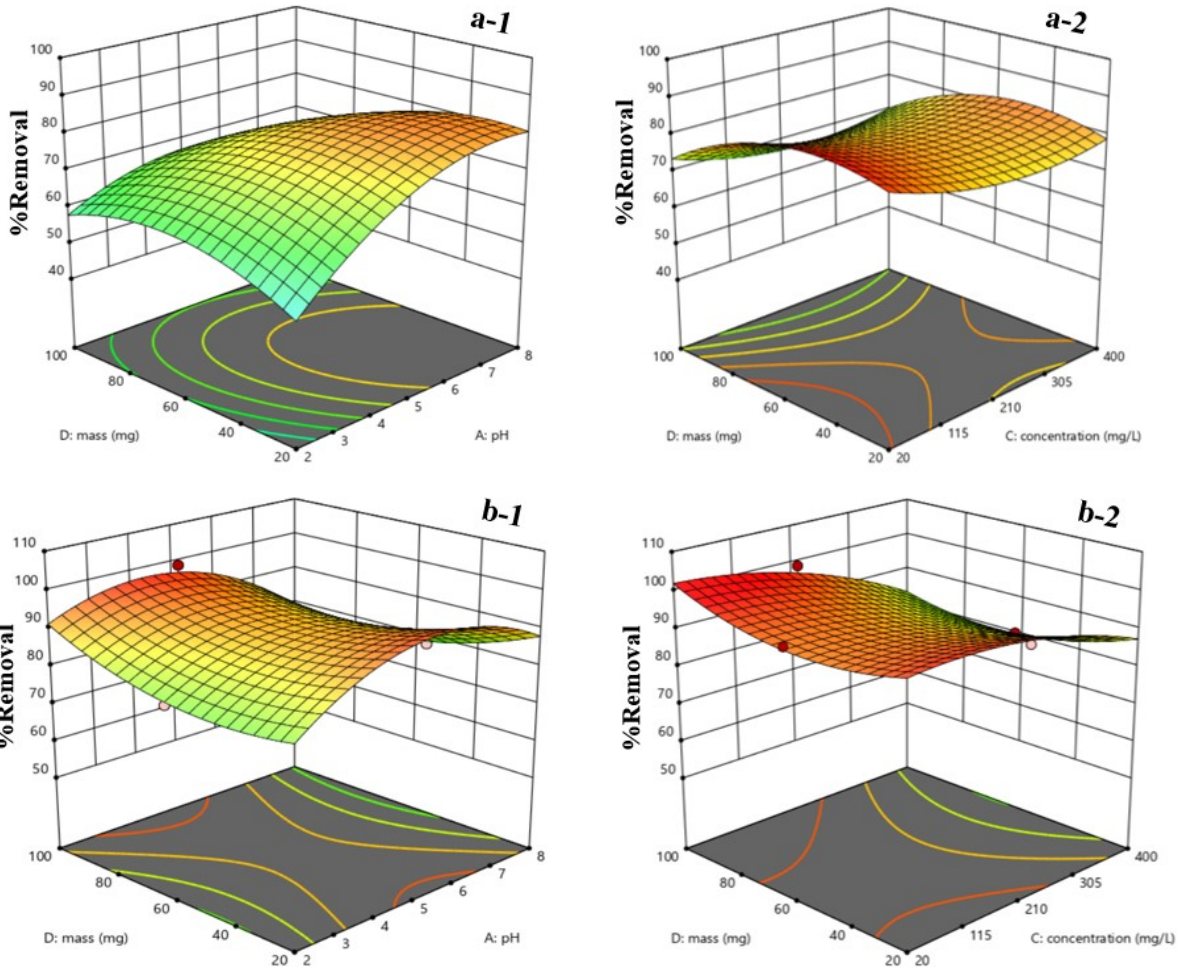

**Figure S3 :** 3D response surface plots of the CCD showing the effect of pH, concentration (mg/L) and mass (mg) on the adsorption of Pb<sup>2+</sup> ion (%Removal) using ACH-L-Cyst (a-1 ; a-2) and AC-KMnO<sub>4</sub> (b-1 ; b-2)

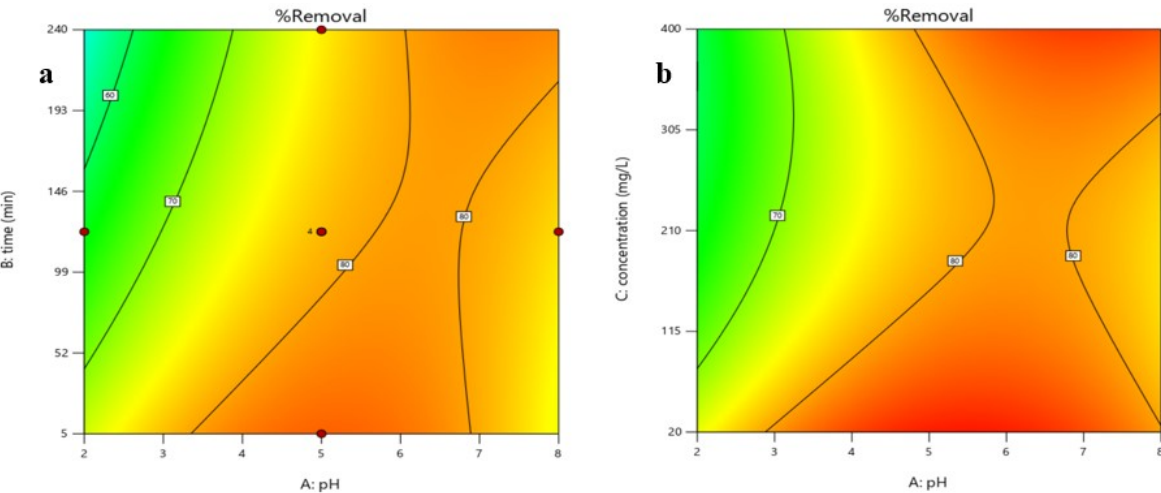

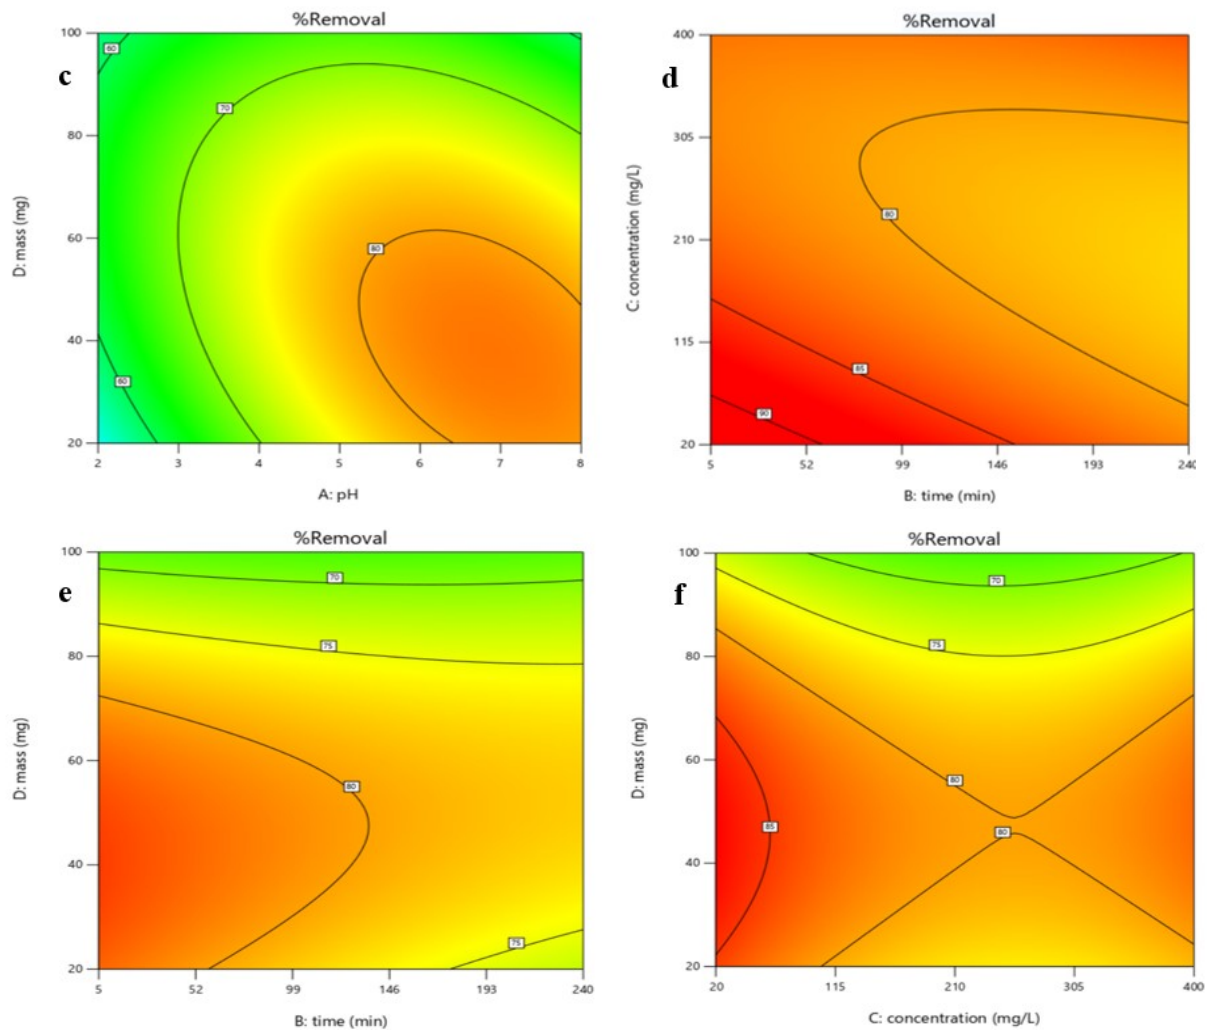

**Figure S4 :** 2D response surface plots of the CCD showing the effect of pH, time (min), concentration (mg/L) and mass (mg) on the adsorption of the  $Pb^{2+}$  (%Removal) using ACH-L-Cyst

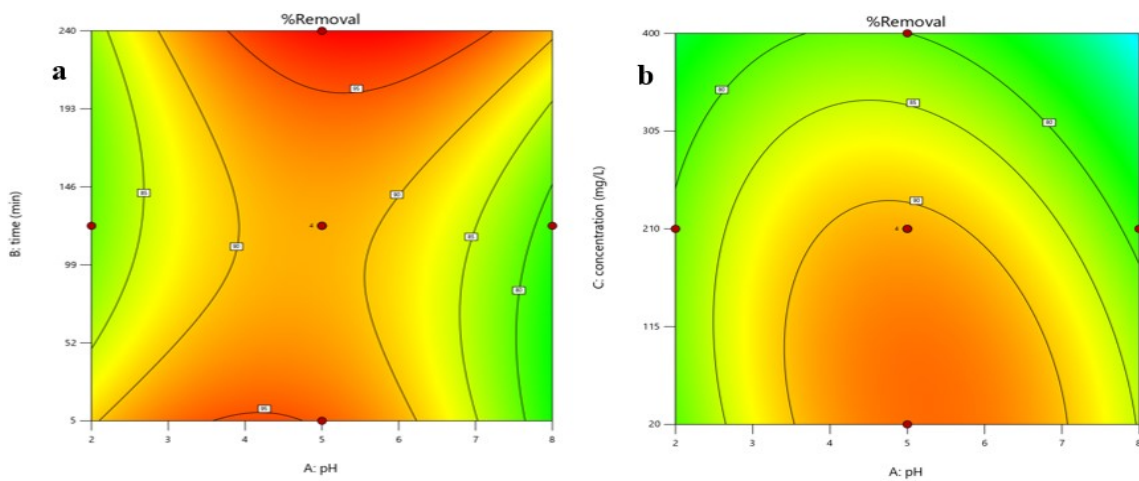

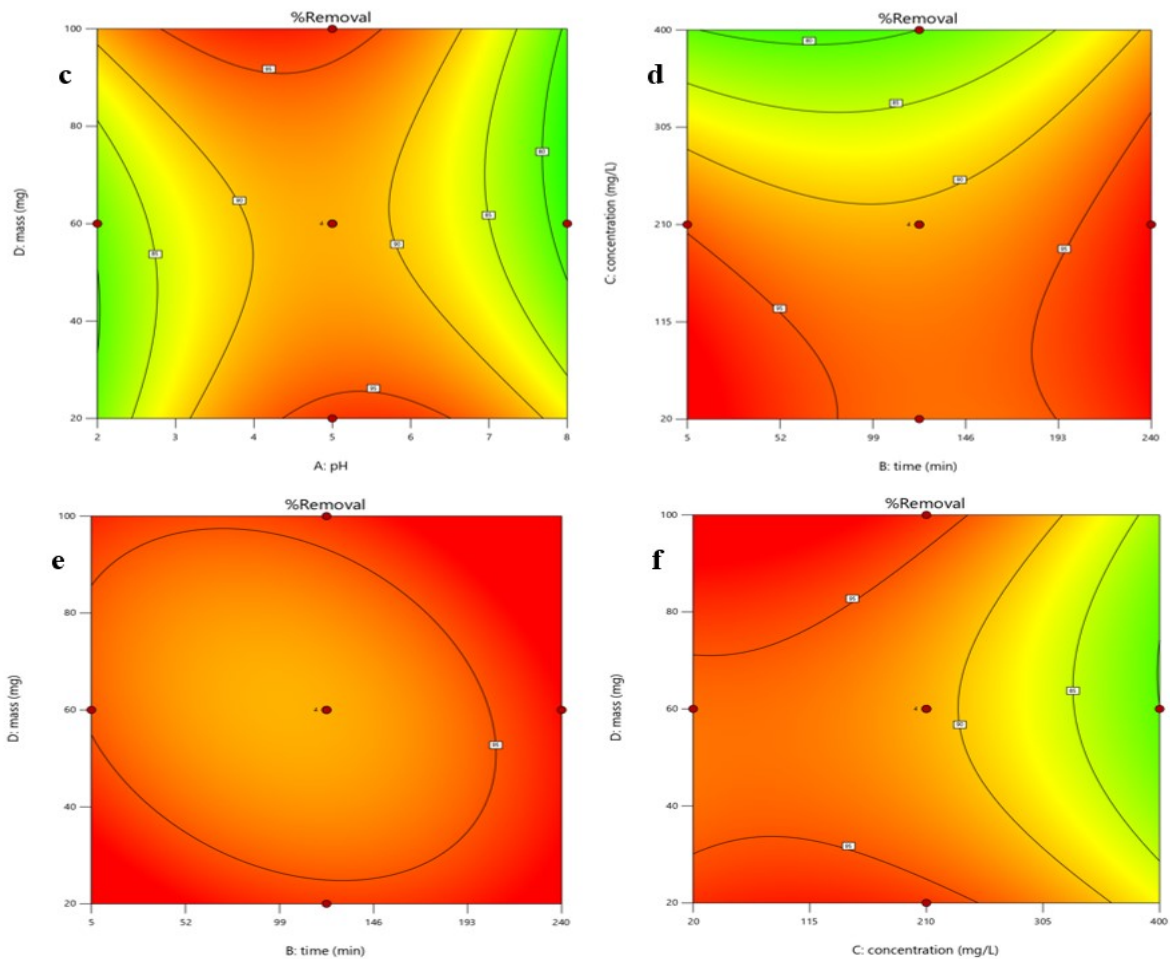

**Figure S5 :** 2D response surface plots of the CCD showing the effect of pH, time (min), concentration (mg/L) and mass (mg) on the adsorption of the  $Pb^{2+}$  (%Removal) using AC-KMnO<sub>4</sub>

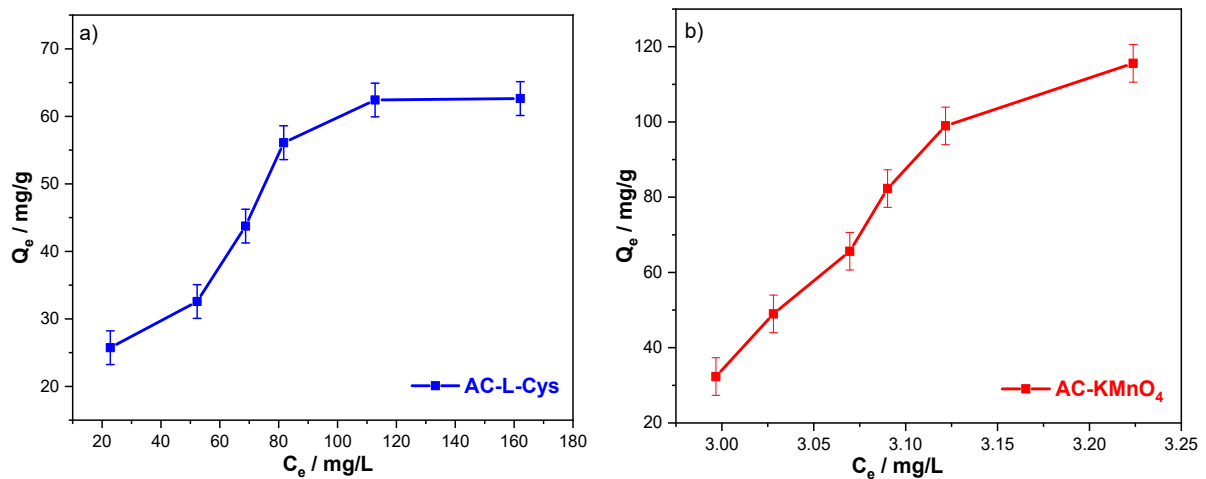

**Figure S6 :** Impact of concentration on the removal of  $Pb^{2+}$  ions by ACH-L-Cyst (a), and AC-KMnO<sub>4</sub> (b)

## Reference

- [1] Y. Liu *et al.*, “Study on the synthesis of poly(pyrrole methane)s with the hydroxyl in different substituent position and their selective adsorption for  $Pb^{2+}$ ,” *Chem. Eng. J.*, 2018, doi: 10.1016/j.cej.2018.12.093.
- [2] V. A. Online, “The effective removal of  $Pb^{2+}$  by activated carbon fibers modified by

- L -cysteine : exploration of kinetics , thermodynamics and mechanism,” pp. 20062–20073, 2022, doi: 10.1039/d2ra01521h.
- [3] Z. Lingkai, X. Man, Y. Yuyuan, and L. Ping, “Thiol -functionalized activated carbon fibers as efficient adsorbents,” *Mater. Chem. Phys.*, vol. 302, no. November 2022, p. 127552, 2023, doi: 10.1016/j.matchemphys.2023.127552.
- [4] I.-H. T. Kuete, D. R. T. Tchuifon, G. N. Ndifor-Angwafor, A. T. Kamdem, and S. G. Anagho, “Kinetic, Isotherm and Thermodynamic Studies of the Adsorption of Thymol Blue onto Powdered Activated Carbons from *Garcinia cola* Nut Shells Impregnated with  $H_3PO_4$  and KOH: Non-Linear Regression Analysis,” *J. Encapsulation Adsorpt. Sci.*, vol. 10, no. 01, pp. 1–27, 2020, doi: 10.4236/jeas.2020.101001.
- [5] M. Zbair, “RSC Advances Reusable bentonite clay : modelling and optimization of hazardous lead and p -nitrophenol adsorption using a response surface methodology approach,” *RSC Adv.*, vol. 9, pp. 5756–5769, 2019, doi: 10.1039/C9RA00079H.
- [6] M. Mushtaq and M. H. Diyanatizadeh, “Job Plot,” *Results Chem.*, no. Vi, p. 102486, 2025, doi: 10.1016/j.rechem.2025.102486.
- [7] D. Alvine Loris *et al.*, “Kinetic and Isotherm Studies of the Adsorption Phenacetin onto Two Copper Porous Coordination Compounds: Nonlinear Regression Analysis,” *J. Chem.*, vol. 2022, 2022, doi: 10.1155/2022/2828860.
